# Supplementary material for: Non-covalent DNA binding and cytotoxicity of certain mixed-ligand ruthenium(ii) complexes of 2,2′-dipyridylamine and diimines
Source: Royal Society of Chemistry journal article supplement (doi:10.1039/b715077f), 2008-01-01
Supplement: b715077f.pdf [file b715077f.pdf]

## Supplementary Material

Communicated to: *Dalton Trans.*  
Ms No: B715077F revised

### **Non-covalent DNA binding and cytotoxicity of certain mixed ligand ruthenium(II) complexes of 2,2'-dipyridylamine and diimines**

**Venugopal Rajendiran,<sup>a</sup> Mariappan Murali,<sup>a,†</sup> Eringathodi Suresh,<sup>b</sup> Mallayan Palaniandavar<sup>a,\*</sup> Vaiyapuri Subbarayan Periasamy,<sup>c</sup> Mohammad Abdulkader Akbarsha<sup>c</sup>**

<sup>a</sup>*School of Chemistry, Bharathidasan University, Tiruchirappalli 620 024, Tamilnadu, India*

<sup>b</sup>*Analytical Science Discipline, Central Salt and Marine Chemical Research Institute, Bhavnagar 364 002, India*

<sup>c</sup>*Department of Animal Science, Bharathidasan University, Tiruchirappalli 620 024, India*

### **<sup>1</sup>H NMR (DMSO-d<sub>6</sub>, 400 MHz)**

The chemical shifts of the free and coordinated ligands are summarized below, along with the coordination-induced shifts (c.i.s. =  $\delta_{\text{complex}} - \delta_{\text{ligand}}$ ) and coupling constants. Spectral assignments were made on the basis of <sup>1</sup>H – <sup>1</sup>H COSY spectra of the complexes and the J values observed are consistent with the assignment.

<sup>1</sup>H NMR (DMSO-d<sub>6</sub>, 400 MHz):  $\delta$  (multiplicity, integration, assignment), ppm, **Hdpa**, 7.737 (d, 2H, H<sub>3</sub>), 7.636 (t, 2H, H<sub>4</sub>), 6.847 (t, 2H, H<sub>5</sub>), 8.213 (d, 2H, H<sub>6</sub>), 9.632 (s, 1H, NH); **phen**, 9.248 (dd, 2H, H<sub>2</sub>), 7.864 (q, 2H, H<sub>3</sub>), 8.570 (dd, 2H, H<sub>4</sub>), 8.048 (s, 2H, H<sub>5</sub>); **5,6-dmp**, 9.091 (d, 2H, H<sub>2</sub>), 7.557 (dd, 2H, H<sub>3</sub>), 8.305 (d, 2H, H<sub>4</sub>), 2.574 (s, 6H, CH<sub>3</sub>); **dpq**, 9.432 (d, 2H, H<sub>2</sub>), 7.923 (dd, 2H, H<sub>3</sub>), 9.221 (d, 2H, H<sub>4</sub>), 9.134 (s, 2H, H<sub>6</sub>); **mdpq**, 9.466 (dd, 2H, H<sub>2</sub>), 7.862 (dd, 2H, H<sub>3</sub>), 9.211 (dd, 2H, H<sub>4</sub>), 9.036 (s, 1H, H<sub>6</sub>), 2.798 (s, 3H, CH<sub>3</sub>); **dppz**, 9.457 (d, 2H, H<sub>2</sub>), 7.905 (t, 2H, H<sub>3</sub>), 9.182 (d, 2H, H<sub>4</sub>), 8.329 (d, 2H, H<sub>7</sub>), 8.030 (t, 2H, H<sub>8</sub>).

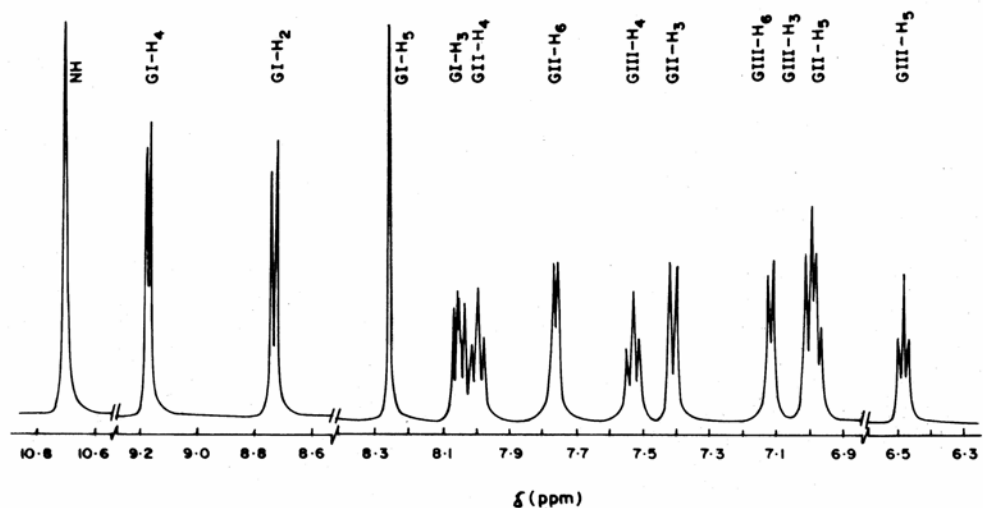

**Fig. S1**  $^1\text{H}$  NMR spectrum of  $[\text{Ru}(\text{Hdpa})_2(\text{phen})]^{2+}$  **1** in  $(\text{CD}_3)_2\text{SO}$ .

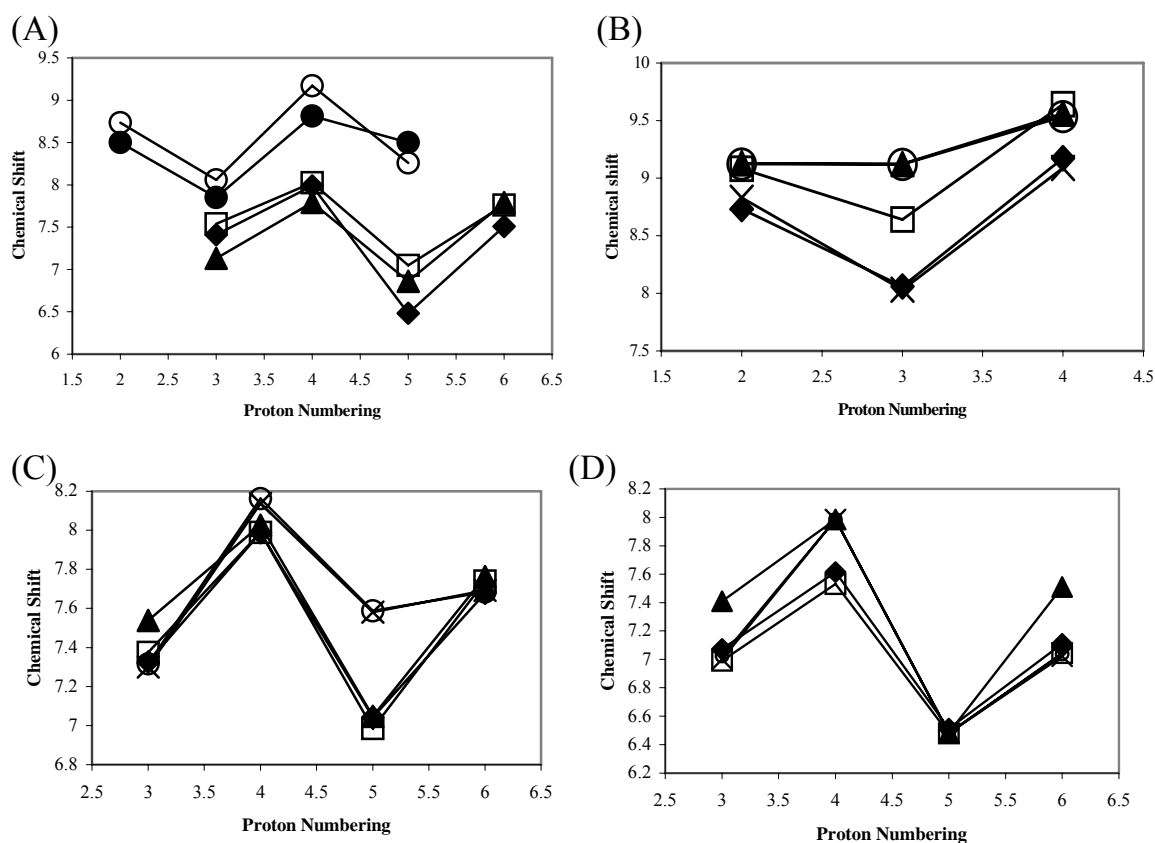

**Fig. S2** The chemical shift patterns of  $[\text{Ru}(\text{Hdpa})_2(\text{phen})]^{2+}$  **1** compared with their corresponding tris analogues and **2-5**. (A) ●:  $[\text{Ru}(\text{phen})_3]^{2+}$ ; ▲:  $[\text{Ru}(\text{Hdpa})_3]^{2+}$ ; ○: Group I; □: Group II; ◆: Group III. (B) Comparison of the chemical shift patterns of H<sub>2</sub>, H<sub>3</sub> and H<sub>4</sub> protons of Group I. ◆: phen (**1**); ×: 5,6-dmp (**2**); ○: dpq (**3**); ▲: mdpq (**4**); □: dppz (**5**). (C) Comparison of the chemical shift patterns of Group II. ▲: **1**; □: **2**; ○: **3**; ×: **4**; ◆: **5**. (D) Comparison of the chemical shift patterns of Group III. ▲: **1**; □: **2**; ○: **3**; ×: **4**; ◆: **5**.
